1 **A histone H4K20 methylation-mediated chromatin compaction**  
2 **threshold ensures genome integrity by limiting DNA replication**  
3 **licensing**

4

5

6 Muhammad Shoaib<sup>1</sup>, David Walter<sup>1</sup>, Peter J. Gillespie<sup>2</sup>, Fanny Izard<sup>3</sup>, Birthe Fahrenkrog<sup>4</sup>, David  
7 Lleres<sup>5</sup>, Mads Lerdrup<sup>1</sup>, Jens Vilstrup Johansen<sup>1</sup>, Klaus Hansen<sup>1</sup>, Eric Julien<sup>3,6</sup>, J. Julian Blow<sup>2</sup>,  
8 Claus S. Sørensen<sup>1\*</sup>

9

10 **Affiliations**

11 <sup>1</sup> Biotech Research and Innovation Centre (BRIC), University of Copenhagen, Ole Maaløes Vej 5,  
12 2200 Copenhagen N, Denmark.

13 <sup>2</sup> Centre for Gene Regulation & Expression, School of Life Sciences, University of Dundee, Dow  
14 Street, Dundee DD1 5EH, UK.

15 <sup>3</sup> Institut de Recherche en Cancérologie de Montpellier (IRCM), INSERM U1194, University of  
16 Montpellier, Institut régional du cancer (ICM), F-34298, France.

17 <sup>4</sup> Institute for Molecular Biology and Medicine, Université Libre de Bruxelles, Charleroi, Belgium.

18 <sup>5</sup> Institut de Génétique Moléculaire de Montpellier, University of Montpellier, CNRS, Montpellier,  
19 France.

20 <sup>6</sup> Centre National de la Recherche Scientifique (CNRS), Montpellier, France.

21

22 \* Corresponding author:

23 Email: [claus.storgaard@bric.ku.dk](mailto:claus.storgaard@bric.ku.dk)

24

25

26 **ABSTRACT**

27 The decompaction and re-establishment of chromatin organization immediately after mitosis is  
28 essential for genome regulation. The mechanisms underlying chromatin structure control in  
29 daughter cells are not fully understood. Here, we show that a chromatin compaction threshold  
30 in cells exiting mitosis ensures genome integrity by limiting replication licensing in G1  
31 phase. Upon mitotic exit, appropriate chromatin relaxation is safeguarded by SET8-dependent  
32 methylation of histone H4 on lysine 20. Thus, in the absence of either SET8 or the H4K20  
33 residue, substantial genome-wide chromatin decompaction occurs which allows excessive  
34 loading of the Origin Recognition Complex (ORC) in the daughter cells. ORC overloading  
35 stimulates aberrant recruitment of the MCM2-7 complex that promotes single-stranded DNA  
36 formation and DNA damage. Restoring chromatin compaction restrains excess replication  
37 licensing and the loss of genome integrity. Our findings identify a cell cycle-specific mechanism  
38 whereby fine-tuned chromatin relaxation suppresses excessive detrimental replication  
39 licensing and maintains genome integrity at the cellular transition from mitosis to G1 phase.  
40



41 In eukaryotic cells, dynamic changes in chromatin structure and compaction are essential for  
42 proper progression through different stages of cell cycle and the maintenance of genome  
43 integrity <sup>1</sup>. During mitosis and cell division chromatin is packaged into highly condensed mitotic  
44 chromosomes that promote error-free segregation of genetic material. Upon mitotic exit,  
45 chromosomes must rapidly switch from compact to more relaxed interphase structures that  
46 facilitate all DNA-based processes, by allowing access to enzymatic machineries involved in  
47 transcription and DNA replication or repair. It is widely believed that changes in histone post-  
48 translational modifications (PTMs) largely contribute to regulate cell cycle chromatin  
49 organization by creating local and pan-nuclear (global) chromatin higher-order structures,  
50 which in turn define nuclear functions <sup>2-4</sup>.

51  
52 Histone phosphorylation and acetylation have been shown to correlate with compact and open  
53 chromatin structures, respectively, during cell cycle transitions. In particular, phosphorylation  
54 on histone H3 serine 10 and 28 and threonine 3, 6 and 11 increase significantly during the  
55 passage from relaxed interphase chromatin structures to condensed mitotic chromosomes <sup>5-7</sup>.  
56 Histone acetylation, on the other hand, creates a less compact chromatin structure by disrupting  
57 electrostatic interactions between histones and DNA <sup>2</sup>. However, most of what is known about  
58 the role of histone PTMs in chromatin structural transitions over the cell cycle has come  
59 through research on the progression from interphase into mitosis. The precise role of histone  
60 PTMs in regulating the transition from compact mitotic chromosomes to decondensed  
61 interphase chromatin structures during M/G1 transition is currently unresolved.

62  
63 At the exit of mitosis, the transition from highly compact chromatin to a less compact interphase  
64 chromatin overlaps with the loading of replication origin licensing factors, in particular the ORC  
65 complex, which are essential for executing proper DNA replication <sup>8</sup>. ORC serves as a scaffold for  
66 the subsequent association of CDC6 and CDT1, which together coordinate the loading of the  
67 MCM2-7 complex in order to form the pre-replication complex (pre-RC) required for replication

68 fork formation and activity. In metazoans, the absence of sequence specificity for ORC binding to  
69 DNA indicates that the local chromatin environment, defined by nucleosome positioning and  
70 histone modifications, might influence ORC recruitment to promote proper licensing of  
71 replication origins<sup>9,10</sup>. Whether chromatin compaction changes that occur from M to G1 phase  
72 impact ORC chromatin association and the establishment of replication origins remains  
73 unknown.

74

75 SET8, the mono-methyltransferase for histone H4 lysine 20 methylation (H4K20me) has  
76 previously been shown to be important for cell cycle progression and maintenance of genome  
77 integrity<sup>11-14</sup>. SET8 and H4K20me peak during G2 and M phases of the cell cycle, this prompted  
78 us to investigate their involvement in chromatin compaction upon mitotic exit. Intriguingly, we  
79 find that SET8 and H4K20me are crucial for maintaining a chromatin compaction threshold  
80 during the cellular transition from mitosis to G1 phase, which suppresses aberrant DNA  
81 replication licensing. Furthermore, we show that loss of genome stability follows aberrant  
82 replication licensing. Together, our results uncover a key cell cycle specific mechanism whereby  
83 chromatin structure limits DNA replication licensing and promote genome integrity throughout  
84 the cellular transition from M to G1 phase.

85

## 86 **RESULTS**

### 87 **SET8 is crucial for maintaining ground-state chromatin compaction in cells exiting**

#### 88 **mitosis**

89 We hypothesized that SET8 could regulate chromatin structure when cells transit from mitosis  
90 (M) to G1 phase. To test this, we first compared the chromatin compaction status of cells  
91 arrested in M with those in G1 in the presence or absence of SET8 using micrococcal nuclease  
92 (MNase) digestion assay. To avoid the deleterious impact of long-term SET8 depletion, we  
93 depleted the enzyme for maximally 21 hours before harvesting cells (Fig. 1a-c). Cells were  
94 simultaneously labelled with methyl-<sup>14</sup>C containing thymidine during the experiment. After  
95 MNase digestion, Methyl-<sup>14</sup>C released into the supernatant was used as a measure of  
96 compaction status of the cells (Supplementary Fig. 1a). The more decompacted and accessible  
97 the chromatin is, the more methyl-<sup>14</sup>C is released in to the supernatant. Notably, the compaction  
98 state of both control and siSET8 cells in mitosis were very similar (judged by the amount of  
99 methyl-<sup>14</sup>C released in the supernatant) (Fig. 1d). In contrast, SET8-depleted cells displayed a  
100 higher level of methyl-<sup>14</sup>C compared to control cells upon progression into G1 phase. This data  
101 suggests that SET8 likely contributes to maintain ground state chromatin compaction in cells  
102 exiting mitosis.

103

104 To complement the results obtained from MNase assay, we investigated the genome-wide  
105 landscape of chromatin accessibility in G1 phase after SET8 depletion. We employed high  
106 throughput sequencing-based assay of transposase accessible chromatin (ATAC-seq)<sup>15</sup>. To this  
107 end, we synchronized and siRNA transfected cells as described in fig. 1a (without nocodazole  
108 block) followed by harvesting cells in the following G1 phase. Supplementary Fig. 1b shows the  
109 average distribution of ATAC-seq peaks in siSET8 vs siControl samples. Importantly, when  
110 visualizing the global signal intensity (Supplementary Fig. 1c) and signal normalized to the  
111 number of reads at individual loci (Supplementary Fig. 1d), it was evident that signal strength

112 was higher in siSET8 cells. These data are consistent with the overall loss of chromatin  
113 compaction in the absence of SET8 as also observed in the MNase assay (Fig. 1d).  
114 To further explore this notion in single and live cells, we performed quantitative analysis of  
115 chromatin compaction at the scale of nucleosome arrays using a FLIM-FRET (Fluorescence  
116 Lifetime Imaging Microscopy-Förster Resonance Energy Transfer) approach in synchronized  
117 cells co-expressing histones H2B-EGFP and mCherry-H2B (named U2OS<sub>H2B-2FPs</sub>). FRET was  
118 measured between fluorescent protein-tagged histones on separate nucleosomes, where an  
119 increase in signal signifies chromatin compaction<sup>16</sup>. siRNA treated confluent cells were diluted  
120 in presence of thymidine to synchronize them at the G1/S transition and FRET signals were  
121 detected and spatially analyzed before and after release from the thymidine block. siControl and  
122 siSET8 cells showed similar compaction profiles as judged by the FRET efficiency map at the  
123 time of release from thymidine (T0) (Fig. 1e, f and Supplementary Fig. 2a-c). In contrast, we  
124 observed a significant reduction in FRET levels in siSET8 G1 phase cells, indicating a major  
125 reduction in the levels of chromatin compaction of these cells compared to control cells (Fig. 1e,  
126 f). To further confirm that SET8 regulates chromatin compaction status in cells exiting mitosis,  
127 we performed a similar FRET-based analysis and compared the chromatin compaction in cells  
128 arrested in G2/M versus G1 cells (Supplementary Fig. 3a, b). In agreement with our MNase  
129 digestion analysis (Fig. 1b), we detected a significantly lower mean FRET efficiency in siSET8  
130 cells in G1 phase, but not at G2/M phases, compared to siControl cells (Supplementary Fig. 3c,  
131 d). Consistent with these results, transmission electron microscopy analysis of siControl and  
132 siSET8 cells also revealed a reduction in chromatin density throughout the nucleus in SET8  
133 depleted cells in G1 phase (Fig. 1g, h). Altogether these results indicate a major role for SET8 in  
134 securing appropriate chromatin compaction during the cellular transition from mitosis to G1  
135 phase of the cell cycle.

136

137 **SET8 regulates chromatin compaction through histone H4 lysine 20 methylation**

138 SET8 is responsible for the methylation of histone H4 at lysine 20, which has previously been  
139 implicated in chromatin compaction in *in vitro* assays<sup>17</sup>. Furthermore, H4-tail interaction with  
140 an acidic patch on H2A/H2B histones on neighboring nucleosomes has also been suggested to  
141 be important for maintaining ground state chromatin structure<sup>18</sup>. We therefore set out to  
142 investigate if SET8 regulates chromatin compaction state through H4K20 methylation in cells.  
143 To achieve this, we again used the FLIM-FRET approach, described earlier and transduced  
144 U2OS<sub>H2B-2FPs</sub> cells with a high titer of retroviral vectors encoding a FLAG-tagged histone  
145 H4 mutant carrying a lysine 20 to alanine substitution (H4K20A). Cells transduced with a virus  
146 encoding a FLAG-tagged wild-type histone H4 (H4K20WT) and mock-transduced cells were  
147 used as controls. After 3 days of viral transduction, FRET efficiency was detected and spatially  
148 analyzed. Immunoblot analysis revealed that FLAG-tagged H4K20WT and H4K20A proteins  
149 were expressed at similar levels and were efficiently incorporated into chromatin leading to a  
150 marked decrease in the global levels of the mono-methylated H4K20 (Supplementary Fig. 3e).  
151 FRET maps revealed a significant decrease in the FRET levels in cells expressing the H4K20A  
152 mutant version of histone H4 as compared to mock and H4K20WT expressing cells (Fig. 1i, j). A  
153 similar decrease in mean FRET percentage was observed in the case of histone H4 lysine 20 to  
154 arginine (H4K20R) mutant expressing cells (Supplementary Fig. 3f and g). Altogether, these  
155 data strongly suggest that SET8 maintains ground state chromatin compaction via histone  
156 H4K20 methylation.

157

### 158 **Proper ground-state chromatin compaction in G1 phase is necessary for the maintenance** 159 **of genome integrity**

160 SET8 has previously been shown to be critical for safeguarding genome stability as evident from  
161 the appearance of DNA damage, cell cycle defects and early embryonic lethality in SET8 knock  
162 out mice<sup>11-13, 19</sup>. Since we observed a notable decrease in chromatin compaction in cells exiting  
163 mitosis in the absence of SET8, we investigated if loss of genome stability parallels compaction  
164 status at this stage of cell cycle. To this end, cells were synchronized with a double thymidine

165 block, treated with SET8 or control siRNA, for 6 hours during the block and then released from  
166 the G1/S transition before analysis for cell-cycle progression and the presence of DNA damage  
167 (Fig. 2a). Our data revealed that cells lacking SET8 and H4K20me1 go through the first S-phase  
168 without DNA damage and only display DNA damage upon mitotic exit. This DNA damage  
169 accumulated as siSET8 cells approach S phase entry, as evidenced by flow cytometry profiles of  
170  $\gamma$ H2A.X positive cells (Fig. 2b-d and supplementary Fig. 4a, b). In addition, we observed an  
171 elevated  $\gamma$ H2A.X nuclear staining (Fig. 2e) and the presence of DNA double strand breaks on  
172 PFGE and neutral COMET assay in siSET8 cells (Fig. 2f, g and Supplementary Fig. 4c). To further  
173 investigate the relationship between chromatin compaction and genome stability, we analyzed,  
174 in a similar experimental setup as for SET8, the genome integrity in the presence of a histone  
175 deacetylase inhibitor (HDACi), which represents a well-known tool to induce genome-wide  
176 chromatin relaxation<sup>20,21</sup> (Fig. 2a). Short treatment of G1 phase synchronized cells with HDACi,  
177 i.e. Trichostatin A (TSA), induced DNA damage (Supplementary Fig. 4d-g) that is reminiscent of  
178 DNA damage observed in the absence of SET8 (Fig. 2b-e). Taken together, these results indicate  
179 that maintenance of chromatin compaction status during the cellular transition from M to G1  
180 phase is critical for safeguarding genome integrity.

181  
182 To verify that DNA damage upon loss of SET8 is not a consequence of improper mitotic  
183 progression, we analyzed synchronized U2OS cells arrested in metaphase (using nocodazole) or  
184 released into G1 phase (Supplementary Fig. 5a). Our results showed that both siControl and  
185 siSET8 cells exit mitosis and enter G1 phase without notable delay and without any initial  
186 measurable DNA damage. siSET8 cells, however, progressively accumulated  $\gamma$ H2A.X in the  
187 daughter cells (Supplementary Fig. 5b). The appearance of DNA damage in the daughter cells  
188 correlates well with the role of SET8 and H4K20me in maintaining ground state chromatin  
189 compaction in cells exiting mitosis.

190

191 Next, we sought to understand if SET8 maintains genome integrity through H4K20 methylation.  
192 To test this, we developed doxycycline (DOX) inducible cell lines expressing either FLAG-HA  
193 tagged wild type histone H4 (H4K20WT) or FLAG-HA tagged histone H4 mutant carrying a  
194 lysine to alanine or arginine substitution at position 20 (H4K20A/R) (supplementary Fig. 5c)  
195 We double thymidine blocked these cells and released them into the cell cycle using our  
196 standard protocol. Cells were fixed and stained for  $\gamma$ H2A.X which revealed DNA damage  
197 signaling in both H4K20A and H4K20R expressing cells as compared to H4K20WT expressing  
198 cells (Fig. 2h, i).

199

### 200 **Forced chromatin compaction rescues genome integrity after SET8 depletion**

201 To further understand the relationship between DNA damage accumulation and chromatin  
202 structure, we addressed if the siSET8 phenotype could be rescued by inducing global chromatin  
203 compaction. To achieve this, we used sucrose, which has been shown to induce molecular  
204 crowding and promote highly reversible chromatin compaction<sup>22,23</sup>. Consistently, in a similar  
205 experimental setup previously described (Fig. 2a), the addition of sucrose in late mitosis  
206 induced a more compact chromatin state as cells reached G1 phase (Supplementary Fig. 6a-b).  
207 Secondly, we ectopically expressed RNF2, a component of the PRC1 complex, which can  
208 compact chromatin independent of its ubiquitin ligase activity<sup>24</sup>. As expected, TEM micrographs  
209 showed that RNF2 expression induced more compact chromatin in siControl and siSET8 cells  
210 (Supplementary Fig. 6a-c). To study the effects of chromatin re-compaction on genome stability,  
211 we used a similar experimental setup as described earlier (Fig. 2a). In agreement with our  
212 hypothesis, addition of sucrose effectively suppressed DNA damage in cells lacking SET8 (Fig. 2j  
213 and Supplementary Fig. 6c). Similar to sucrose treatment, ectopic expression of RNF2  
214 suppressed the challenge to genome integrity in siSET8 cells (Fig. 2k and Supplementary Fig.  
215 6d,e). Taken together, these results suggest that maintenance of genome integrity in cells exiting  
216 mitosis and progressing through G1 phase depends on the degree of chromatin compaction set  
217 by the SET8-H4K20me pathway.

218

219 **A chromatin compaction threshold restricts excessive loading of licensing proteins**

220 During late mitosis and early G1 phase of the cell cycle, the six-subunit origin recognition  
221 complex (ORC), together with CDC6 and CDT1, loads the replicative helicase complex MCM2–7  
222 onto DNA, a process also termed replication licensing or pre-Replication Complex (pre-RC)  
223 formation<sup>25-27</sup>. As SET8 and H4K20me have also emerged as regulators of replication origin  
224 licensing<sup>28,29</sup>, we wondered whether the ability of SET8 to ensure chromatin compaction in  
225 cells exiting mitosis could impact licensing. To address this question, we first examined levels of  
226 ORC1 and MCM2 proteins selected as licensing markers. Cells were pre-extracted to remove  
227 soluble proteins prior to fixation and antibody staining procedure. This approach revealed  
228 increased nuclear abundance of pre-RC proteins in siSET8 cells (Fig. 3a-c). Similarly, an increase  
229 in the chromatin loading of replication proteins was observed in siSET8 cells in G1 phase by  
230 immunoblot analysis (Fig. 3d, e and Supplementary Fig. 7a).

231

232 To test whether this increase in chromatin loading of pre-RC proteins is related to H4K20me,  
233 we employed doxycycline (DOX) inducible H4K20WT or H4K20A expressing cell lines. Cells  
234 were synchronized with double thymidine block as previously described (Fig. 2a). To induce the  
235 expression of histone H4K20WT/A variants, DOX was added at the start of the experiment. Cells  
236 were harvested at 15 hours post G1/S release and analyzed for levels of the ORC1 and MCM2  
237 licensing markers. Our results revealed significantly higher levels of chromatin bound ORC1 and  
238 MCM2 in cells expressing H4K20A as compared to H4K20WT expressing cells (Fig. 3f-i). These  
239 results strongly support the notion that SET8-mediated H4K20 methylation creates a chromatin  
240 environment that limits the amount of ORC and MCM recruited on chromatin in G1 phase.  
241 Accordingly, we also noticed that an increase in ORC1 and MCM2 staining in cells treated with  
242 an HDACi (TSA) in a similar experimental setup (Supplementary Fig. 7b-e), suggesting that the  
243 over-loading of these pre-RC components is caused by alterations in the levels of chromatin  
244 compaction. Furthermore, MCM loading was significantly restricted when cells were treated



245 with sucrose-based hypertonic medium to induce a more compact chromatin environment (Fig.  
246 3e and Supplementary Fig. S7f and g). Altogether, these results support our notion that  
247 chromatin compaction regulates the replication origin licensing process, likely by limiting the  
248 accessibility of DNA that may serve as pre-RC binding sites.

249

### 250 **Chromatin structure limits accumulation of ssDNA**

251 Next, we investigated how aberrant replication licensing can impact genome integrity. In this  
252 regard, we first investigated the phosphorylation of MCM2 on serine 53 (MCM2-S53p) by  
253 Cdc7/Dbf4-dependent kinase (DDK), which is thought to be an essential step in the activation of  
254 the replicative helicase, starting at G1/S border <sup>30,31</sup>. Interestingly, we found that the MCM2-  
255 S53p is markedly increased in siSET8 cells (Supplementary Fig. 8a, b). A consequence of MCM  
256 activation is DNA unwinding leading to the formation of single stranded DNA (ssDNA), which is  
257 a key step in the replication process. Such unwinding is normally strictly regulated spatially and  
258 temporally, occurring only at a fraction of replication origins starting at the G1/S boundary and  
259 continuing throughout S phase <sup>32</sup>. We asked if alteration in chromatin compaction status could  
260 lead to accumulation of ssDNA after brief depletion of SET8. For this purpose, we analyzed  
261 native BrdU staining as ssDNA readout in synchronized cells progressing towards the G1/S  
262 transition. We pulse labelled cells with BrdU at the time of release from double thymidine block  
263 and fixed them in next cell cycle (15h from G1/S release). Notably, native BrdU signal was highly  
264 abundant in cells lacking SET8 suggesting the presence of ssDNA as compared to that in the  
265 control situation (Fig. 4a, b). Consistently, the major ssDNA binding protein RPA <sup>33,34</sup> was  
266 increased on chromatin in the absence of SET8 further implying the presence of ssDNA (Fig. 4c  
267 and Supplementary Fig. 8c, d).

268

269 To further investigate the role of chromatin structure in controlling replication licensing and  
270 preventing DNA unwinding, we analyzed both native BrdU signal and RPA chromatin loading in  
271 cells treated with sucrose, in the same experimental setup as in Fig. 4a. Indeed, native BrdU

272 signal and RPA loading were significantly reduced by adding hypertonic medium to cells lacking  
273 SET8 (Fig. 4a-c and Supplementary Fig. 8c). Taken together, these data indicate that chromatin  
274 compaction threshold prevents DNA unwinding possibly by limiting the chromatin association  
275 of pre-RC components in cells progressing through G1 phase.

276

### 277 **Chromatin-mediated suppression of the MCM2-7 complex promotes genome integrity**

278 Our results suggested an important role for suppression of MCM activity in chromatin  
279 compaction dependent genome integrity. To further test this, we first depleted the MCM7  
280 subunit of the MCM2-7 complex to levels sufficient to still allow cell cycle progression  
281 (Supplementary Fig. 9a, b). Conspicuously, reducing MCM7 protein levels inhibited the  
282 challenge to genome integrity in cells lacking SET8 (Fig. 4d, e). Importantly, ssDNA levels were  
283 also reduced after MCM7 co-depletion in cells lacking SET8 (Supplementary Fig. 9b).

284

285 DDK-dependent phosphorylation is required for activation of MCM2-7 helicase activity<sup>35,36</sup>.

286 Moreover, in yeast, it has been reported that an MCM5 mutant mimics CDC7 dependent MCM-  
287 complex phosphorylation and activates the helicase activity of the MCM-complex leading to  
288 aberrant DNA unwinding<sup>37</sup>. Therefore, to further verify the functional involvement of MCMs in

289 cells with perturbed chromatin compaction, we determined if DDK activity contributes to

290 ssDNA accumulation and  $\gamma$ H2A.X signaling. Notably, we observed a dramatic reduction in DNA

291 damage, as evident from  $\gamma$ H2A.X positive cells, when two different DDK inhibitors (PHA-767491

292 & XL413)<sup>38-40</sup> were added to the cells lacking SET8 (Fig. 4f and Supplementary Fig. 9c).

293 Moreover, treatment of siSET8 cells with DDK inhibitor reduced ssDNA accumulation

294 (Supplementary Fig. 9d). These results support our hypothesis that chromatin structure plays

295 an important role in proper loading and timing of activation of licensing factors.

296

297 Finally, we sought to determine whether chromatin relaxation precedes DNA damage rather

298 than the alternative scenario where DNA damage leads to chromatin relaxation. To this end, we

299 performed MNase digestion of nuclei lacking SET8 and simultaneously treated with DDKi to  
300 suppress MCM-dependent genome instability. The results revealed that siSET8 cells retained  
301 their relaxed chromatin even in the absence of DNA damage (Supplementary Fig. 9e).  
302 Collectively, these results suggest that abnormal chromatin relaxation precedes events that lead  
303 to the loss of genome integrity.

## 304 **DISCUSSION**

305 Here, we identify a tightly regulated chromatin compaction threshold, whereby SET8-mediated  
306 H4K20 methylation limits replication licensing (Fig 4g, h). This ensures proper replication to  
307 maintain genome stability through the cell cycle. These results provide a novel link between  
308 cell-cycle specific chromatin structure regulation and genome integrity.

309

310 Our data regarding the role of H4K20me in maintaining ground-state chromatin compaction is  
311 in agreement with previous in-vitro studies, in which histone H4-tail domains have been shown  
312 to induce short-range nucleosome–nucleosome interactions contributing to local array  
313 compaction and ‘higher order’ chromatin folding<sup>41,42</sup>. Notably, nucleosome crystallization  
314 studies revealed that histone H4 tail residues from lysine 16 to isoleucine 26 interacts with an  
315 H2A/H2B acidic patch on a neighbouring nucleosome<sup>18,43,44</sup>. In vitro studies also revealed that  
316 in addition to acidic patch interaction, a region of the H4 tail close to the histone fold domain  
317 mediates internucleosomal interactions through direct contacts to both DNA and protein targets  
318 in condensed chromatin structures<sup>45,46</sup>. In this regard, H4K20me may favour more stable H4  
319 internucleosomal interactions either through increased H4 tail-acidic patch interactions or via  
320 H4 tail-DNA interactions or both, which is consistent with our results obtained in single-cell-  
321 based FRET assay. Further, we find that global chromatin compaction in mitosis is not affected  
322 in cells lacking SET8 and proper H4K20me levels. The high degree of condensation during  
323 mitosis may be more dependent upon other factors such as the SMC complex proteins<sup>47-50</sup>.

324

325 Our data suggest that a histone H4K20me-dependent chromatin compaction threshold imposes  
326 constraints and hence, regulates the chromatin loading of ORC and the MCM2-7 complexes. This  
327 is consistent with recent reports using *in vitro* replication assays to suggest that chromatin  
328 enforces origin specificity by suppressing nonspecific ORC binding<sup>51,52</sup>. The licensing of  
329 replication origins can, therefore, be viewed as an opportunistic mechanism aided by the ORC  
330 complex’s (and MCM2-7 complex) affinity for DNA per se, where ORC bound at future

331 replication origins may promote MCM2-7 complex loading and replication initiation by  
332 establishing a permissive nucleosome-free chromatin environment<sup>52,53</sup>. Consistently, the  
333 affinity of ORC1 and ORC-associated protein (ORCA) to H4K20me marks and the role of SET8 in  
334 the maintenance of properly compact chromatin structure would contribute to create a  
335 restricted number of high ORC affinity sites at specific positions along the genome<sup>28,29,54</sup>.  
336 Therefore, in G1 cells depleted for SET8, our data suggest that both the impairment of SET8-  
337 mediated high affinity for ORC proteins and the de-compacted chromatin environment lead to  
338 opportunistic binding of ORC/MCM complexes to DNA, thereby causing this promiscuous  
339 overloading in G1 cell-cycle phase. Furthermore, increased loading of licensing factors in the  
340 context of decompacted chromatin may not only allow for increased availability of the substrate  
341 to the activating kinases (DDK/CDKs) but also facilitates access for these S phase kinases,  
342 thereby promoting accumulation of ssDNA. Thus, we suggest that moderately compacted  
343 chromatin with appropriate H4K20 methylation levels limits the number of potentially available  
344 ORC binding sites for the formation of replication origins and in turn keep a check on activating  
345 kinases.

346  
347 Previous studies linked SET8 and H4K20me with a positive role in licensing<sup>29,54</sup>. However,  
348 these studies were carried out under extended periods of analysis (e.g. more than 72 hours in  
349 Tardat et al<sup>29</sup>), when loss of SET8 activity significantly reduced H4K20me2 and H4K20me3  
350 levels and thus affected the stability of ORC complex binding to chromatin<sup>28,29</sup>. Furthermore,  
351 these studies mainly focused on the consequence of SET8 stabilization during S-phase. In the  
352 current study, we used relatively short-term depletion of SET8 (21 hours) in synchronized cells,  
353 thereby allowing the persistence of H4K20me2 (Fig. 3d) that serves as an ORC recruiting  
354 chromatin mark. Notably, this approach allowed us to uncover specifically the role of SET8-  
355 mediated chromatin compaction in replication licensing after a single passage through mitosis.  
356 Of note, our finding that general HDAC inhibition shows a highly similar effect, which is

357 mediated by chromatin structure control, further supports a general role of chromatin  
358 compaction in the regulation of replication licensing process.  
359  
360 SET8 has previously been shown to promote genome stability and proper S phase progression  
361 <sup>11,12</sup>. In the current work, we demonstrated that appearance of DNA damage in the absence of  
362 SET8 parallels with the loss of ground-state chromatin compaction and aberrant licensing in  
363 cells exiting mitosis. These events are followed by abnormal activation of MCM helicase and an  
364 accumulation of ssDNA. Thus, our findings shed light on a fundamental role of SET8 in  
365 maintaining chromatin structure, thereby explaining initial events leading to appearance of high  
366 levels of replication stress and DNA damage during S phase in cells lacking SET8 <sup>11,12</sup>.  
367 Furthermore, our data indicate that SET8 regulates chromatin compaction and maintains  
368 genome stability specifically via histone H4K20 methylation. Overall, these findings support the  
369 notion that chromatin structural organization in G1 phase allows for fine-tuned regulation of  
370 DNA-based processes, such as replication, thereby preventing replication stress and  
371 endogenous damage <sup>55</sup>.  
372

373 **Materials and methods**

374

375 **Cell culture, cell cycle synchronization, and chemicals**

376 U2OS were maintained in Dulbecco's modified Eagle's medium containing 10% fetal bovine  
377 serum (FBS) and 1% Penicillin-Streptomycin. For synchronization at G1/S, U2OS cells were  
378 cultured in the presence of 2 mM thymidine (Sigma) for 20 h, washed three times with PBS, and  
379 released in fresh medium without thymidine for 10 h. After another 17 h in thymidine, cells  
380 were washed three times with PBS and cultured in fresh medium. Cells were then collected at  
381 15 h. Doxycycline inducible stable cell lines were generated using Lenti-X Tet-One inducible  
382 expression system (Clontech Laboratories). Briefly, N-terminal FLAG-HA and histone H4 cDNA  
383 as HindIII-EcoRI fragment were cloned into pLVX-TetOne-Puro vector to generate pLVX-H4WT  
384 using In-Fusion-HD cloning kit (Clontech Laboratories). pLVX-H4K20A/R variants were  
385 generated using site directed mutagenesis. For constitutively expressing histone H4WT and  
386 H4K20A/R variants, pQCXIP-H4WT was generated by cloning the histone H4 cDNA and a C-  
387 terminal 3× FLAG sequence as an Age1-Not1 fragment into the pQCXIP vector (Clontech).  
388 pQCXIP H4K20A substitution mutant was generated by site-directed mutagenesis (Agilent)<sup>56</sup>.  
389 For various cellular treatments, the following drugs were used: 3 μM DDKi (PHA-767491 &  
390 XL413 were from Sigma), TSA 25 μM (Sigma), Sucrose 125 mM (Sigma), Nocodazole 40 ng/ml  
391 (Sigma), Doxycycline 1 μg/ml (Sigma).

392

393 **siRNA Transfections**

394 siRNA transfections were performed with 20 nM siRNA duplexes using Lipofectamine®  
395 RNAiMAX (Invitrogen), according to the manufacturer's instructions. The siRNA sequences used  
396 for knockdown are (5'-3'):  
397 SET8 human (GUACGGAGCGCCAUGAAGU),  
398 MCM7 (UAGCCUACCUCUACAAUGA),

399

## 400 **Flow cytometry**

401 Cells were fixed in 70% ethanol and stained with antibodies against phospho-Histone H3-S10  
402 (1:250; 06-570, Millipore) and  $\gamma$ H2A.X (1:1000; 05-636/JBW301, Millipore) for 1 h followed by  
403 1 h incubation with Alexa Fluor 488 and 647 secondary antibodies (1:1000; Invitrogen). DNA  
404 was stained using 0.1 mg/ml propidium iodide containing RNase for 30 min at 37°C. Flow  
405 cytometry analysis was performed on FACSCalibur using CellQuest Pro software (BD). Data  
406 were analyzed using FlowJo software (v7.2.2; Tree Star).

407

## 408 **Cellular fractionation and chromatin isolation**

409 To obtain soluble and chromatin-enriched cellular fractions, cell fractionation was performed.

410 In brief, cells were lysed for 30 min in a small volume of CSK buffer (0.5% Triton X-100, 10 mM  
411 Pipes, pH 6.8, 300 mM sucrose, 100 mM NaCl, and 1.5 mM  $MgCl_2$ ). The lysed cells were pelleted  
412 by centrifugation at 2,000 g, and supernatant was collected (soluble fraction). The pellet was  
413 washed once with CSK buffer, resuspended in 0.2 M HCl, and incubated at 4°C for 2 h. The  
414 supernatant represented the chromatin- enriched fraction. HCl-containing samples were  
415 neutralized with Tris buffer before SDS-PAGE.

416 To obtain, cytoplasmic, nuclear and chromatin fractions, cellular fractionation was performed as  
417 previously described<sup>29,57</sup>. Briefly, cells were resuspended in buffer A (10 mM HEPES, [pH 7.9],  
418 10 mM KCl, 1.5 mM  $MgCl_2$ , 0.34 M sucrose, 10% glycerol, 1 mM DTT, 5  $\mu$ g of aprotinin per ml, 5  
419  $\mu$ g of leupeptin per ml, 0.5  $\mu$ g of pepstatin A per ml 0.1 mM phenylmethylsulfonyl fluoride).  
420 Triton X-100 (0.1%) was added, and the cells were incubated for 5 min on ice. Nuclei were  
421 collected in pellet 1 (P1) by low-speed centrifugation (4 min, 1,300  $\times$  g, 4°C). The supernatant  
422 (S1) was further clarified by high-speed centrifugation (15 min, 20,000  $\times$  g, 4°C) to remove cell  
423 debris and insoluble aggregates (S2). Nuclei were washed once in buffer A, and then lysed in  
424 buffer B (3 mM EDTA, 0.2 mM EGTA, 1 mM DTT, protease inhibitors as described above).  
425 Insoluble chromatin (S3) was collected by centrifugation (4 min, 1,700  $\times$  g, 4°C), washed once in



426 buffer B, and centrifuged again under the same conditions. The final chromatin pellet (P3) was  
427 resuspended in Laemmli buffer and sonicated.

428

#### 429 **Immunoblotting and antibodies**

430 Cells were lysed on ice in cold EBC-buffer (150 mM NaCl; 50 mM TRIS pH 7.4; 1 mM EDTA; 0.5%  
431 NP-40/Igepal) containing protease inhibitors (1% aprotinin, 5  $\mu\text{g ml}^{-1}$  leupeptin, 1 mM PMSF),  
432 phosphatase inhibitors (50 mM Sodium Fluoride;  $\beta$ -glycerophosphate; 0.5  $\mu\text{M}$  Calyculin A) and  
433 1 mM DTT. The lysates were sonicated using a digital sonifier (102C CE Converter; Branson).

434 Proteins were separated by SDS-PAGE and transferred to a nitrocellulose membrane. Blocking  
435 and blotting with primary antibodies were performed in PBS-T supplemented with 5%

436 skimmed milk powder. Proteins were visualized on films using secondary HRP-conjugated

437 antibodies (1:10,000; Vector Laboratories) and ECL (GE Healthcare). Films were developed

438 using an x-ray machine (Valsoe; Ferrania Technologies). The following commercial rabbit

439 antibodies were used in this study: SET8 (06-1304, Millipore), H3 (ab1791, Abcam), pRPA2-

440 S4/S8 (A300-245A, Bethyl labs). The following commercial mouse antibodies were used:

441  $\gamma\text{H2A.X}$  (05-636/JBW301, Millipore), MCM2 (610700, BD Transduction Lab), MCM7 (sc-9966,

442 Santa Cruz), RPA2 (Millipore), Actin (MAB1501, Millipore) and Vinculin (V9131, Sigma).

443

#### 444 **Immunofluorescence microscopy**

445 Cells were grown on coverslips, washed with phosphate-buffered saline (PBS), fixed with

446 Formaldehyde 4% for 10 min, permeabilized with PBS containing 0,3% Triton X-100 for 10 min

447 and blocked for 1 h in PBS containing 0.1% Triton X-100 and 3% BSA prior to incubation with

448 primary antibodies for  $\gamma\text{H2A.X}$  (05-636/JBW301, Millipore), pRPA2-S4/S8 (A300-245A, Bethyl

449 labs), pMCM2-S53 (A300-756A, Bethyl labs), Cyclin A (H-432, sc-751, Santa Cruz). For RPA2

450 (Millipore), MCM2 (610700, BD Transduction Lab), BrdU (RPN20AB, Amersham) and HA

451 (MMS101P, Covance) cells grown on coverslips were washed with PBS, then extracted for 3 min

452 in ice cold pre-extraction buffer (0.5% Triton X-100, 20 mM HEPES, pH 7.5, 300 mM sucrose, 50

453 mM NaCl, and 3 mM MgCl<sub>2</sub>), washed with PBS and fixed with 4% formaldehyde for 10 min and  
454 then incubated in primary antibodies. Secondary antibodies were from donkey and conjugated  
455 with Alexa Fluor fluorochromes (Invitrogen). Images were acquired using either Leica TCS SP8  
456 confocal microscope or Zeiss LSM880 in AiryScan super resolution mode.

457

#### 458 **Micrococcal nuclease digestion**

459 2 million U2OS cells were labeled with <sup>14</sup>C (radioactive isotope of Carbon) during  
460 synchronization with double thymidine and were harvested in G1 phase. Nuclei were prepared  
461 as described previously<sup>58</sup>. Briefly, cells for each condition were resuspended in cytosolic lysis  
462 buffer (10 mM Tris-HCl, pH 7.5, 10 mM NaCl, 5 mM MgCl<sub>2</sub>, 0.5% NP-40, and 0.25 mM PMSF) and  
463 incubated on ice for 8 min. Nuclei were pelleted by centrifugation (500 g for 5 min at 4°C). The  
464 pellet was washed once in nuclei buffer (60 mM KCl, 15 mM NaCl, 0.34 M sucrose, 0.25 mM  
465 PMSF, and 1 mM DDT) and resuspended in nuclei buffer. 2 mM CaCl<sub>2</sub> was added, and the  
466 samples were pre-warmed to 25°C. Micrococcal nuclease (0,1 U/μl; Sigma- Aldrich) was added  
467 to each sample and aliquoted into 7 pre-chilled eppendorf tubes. 6 tubes were incubated at 37°C  
468 for the indicated time period (0, 1, 3, 8, 13 and 20 min) and 1 tube from each sample was  
469 sonicated as a control for <sup>14</sup>C incorporation efficiency in the cells. All samples were immediately  
470 centrifuged at 10,000 g and supernatants were collected in the scintillation tubes containing 4  
471 ml of scintillation liquid (Ultima Gold, Perkin Elmer). All samples were quantified using  
472 scintillation counter.

473

#### 474 **Electron microscopy**

475 Cells were fixed in Karnofski solution (3% paraformaldehyde, 0.5% glutaraldehyde in 10 mM  
476 PBS, pH 7.4) for 1 hour, washed once in PBS and post-fixed first in 1% reduced osmium  
477 tetroxide (containing 1.5% potassium ferricyanide) for 40 minutes and subsequently in 1%  
478 osmium tetroxide for another 40 minutes. After washing in water, fixed samples were  
479 dehydrated, embedded in Epon resin, and processed for EM as described<sup>59</sup>. EM micrographs

480 were recorded on a Phillips CM-100 transmission electron microscope equipped with a CCD  
481 camera at an acceleration voltage of 80 kV. Images were recorded using the systems software  
482 and processed using Adobe Photoshop.  
483 Quantification of chromatin density was performed using ImageJ. Briefly, on each image 15  
484 points/areas were randomly selected and pixel density was measured. Pixel density of the  
485 background was measured at 5 random image points outside the cell. Background density was  
486 subtracted from the measured chromatin density and values were normalized relative to  
487 chromatin density in control siRNA treated cells set as 1 (Fig. 1h). To avoid negative relative  
488 values, values in Fig. S6b were normalized to the lowest value (siSET8), which was defined as 1.  
489

#### 490 **FLIM-FRET measurements and analysis**

491 FLIM-FRET experiments were performed in U2OS cells stably expressing H2B-GFP alone  
492 (U2OS<sub>H2B-GFP</sub>) or with mCherry tagged histone H2B (U2OS<sub>H2B-2FPs</sub>). Fluorescence Lifetime  
493 Imaging Microscopy (FLIM) was performed using an inverted laser scanning multiphoton  
494 microscope LSM780 (Zeiss) equipped with temperature- and CO<sub>2</sub>-controlled environmental  
495 black walls chamber. Measurements were acquired in live cells at 37°C, 5% CO<sub>2</sub>, and with a  
496 40×oil immersion lens NA 1.3 Plan-Apochromat objective from Zeiss. Two-photon excitation  
497 was achieved using a Chameleon Ultra II tunable (680–1080 nm) laser (Coherent) to pump a  
498 mode-locked frequency-doubled Ti:Sapphire laser that provided sub-150-femtosecond pulses at  
499 a 80-Mhz repetition rate with an output power of 3.3 W at the peak of the tuning curve (800  
500 nm). Enhanced detection of the emitted photons was afforded by the use of the HPM-100  
501 module (Hamamatsu R10467-40 GaAsP hybrid PMT tube). The fluorescence lifetime imaging  
502 capability was provided by TCSPC electronics (SPC- 830; Becker & Hickl GmbH). TCSPC  
503 measures the time elapsed between laser pulses and the fluorescence photons. EGFP and  
504 mCherry fluorophores were used as a FRET pair. The optimal two-photon excitation wavelength  
505 to excite the donor (EGFP) was 890 nm. Laser power was adjusted to give a mean photon count  
506 rate of the order 1.10<sup>5</sup>-5.10<sup>5</sup> photons/sec. Fluorescence lifetime measurements were acquired

507 over 60 sec and fluorescence lifetimes were calculated for all pixels in the field of view  
508 (256×256 pixels). The analysis of the FLIM measurements was performed by using the  
509 SPCImage software (Becker & Hickl, GmbH). Because FRET interactions cause a decrease in the  
510 fluorescence lifetime of the donor molecules (EGFP), the FRET efficiency was calculated by  
511 comparing the FLIM values obtained for the EGFP donor fluorophores in presence (U2OS<sub>H2B-2FPs</sub>)  
512 and absence (U2OS<sub>H2B-GFP</sub>) of the mCherry acceptor fluorophores. FRET efficiency (E FRET) was  
513 derived by applying the following equation:  $E \text{ FRET} = 1 - (\tau_{DA}/\tau_D)$ , where  $\tau_{DA}$  is the mean  
514 fluorescence lifetime of the donor (H2B-EGFP) in the presence of the acceptor mCherry-H2B in  
515 U2OS<sub>H2B-2FPs</sub> cells and  $\tau_D$  is the mean fluorescence lifetime of H2B-EGFP (in absence of acceptor)  
516 in U2OS<sub>H2B-GFP</sub> cells that are present in the same field of view. FRET efficiency values were  
517 calculated from 20 to 30 cells and then normalized. Graphical representation was done using  
518 GraphPad Prism software.

519

## 520 **ATAC-seq**

521 ATAC-seq was performed as originally described by Buenroostro et al <sup>15</sup>. Briefly, nuclei were  
522 prepared by spinning 50,000 cells at 500g for 5 min, followed by washing with ice cold 1X PBS  
523 followed by centrifugation at 500g for 5 min. Cells were lysed using cold lysis buffer (10 mM  
524 Tris-HCl, pH 7.4, 10 mM NaCl, 3 mM MgCl<sub>2</sub> and 0.1% NP40, followed by centrifugation at 500g  
525 for 10 min using a refrigerated centrifuge. Following the nuclei prep, the pellet was  
526 resuspended in the transposase reaction mix (25  $\mu$ L 2× TD buffer, 2.5  $\mu$ L transposase (Illumina)  
527 and 22.5  $\mu$ L nuclease-free water) and incubated at 37 °C for 30 min. The sample was purified  
528 using a Qiagen MinElute kit. After purification, the DNA fragments were amplified using Nextera  
529 PCR master mix (NPM) and 1.25  $\mu$ M of custom Nextera (Illumina) PCR primers 1 and 2, using  
530 the following PCR conditions: 72 °C for 5 min; 98 °C for 30 s; and thermocycling at 98 °C for 10  
531 s, 63 °C for 30 s and 72 °C for 1 min. We performed the size selection (<600 bp) using Ampure  
532 XP magnetic beads (Beckman Coulter Inc.) according to manufacturer's protocol. To reduce GC  
533 and size bias in our PCR, we performed a qPCR-based library quantification. First, 1/5<sup>th</sup> of the

534 purified PCR product was amplified using 2x KAPA SYBR FAST qPCR Master mix (KK4932) for  
535 40 cycles. The optimal number of cycles were determined by the cycle number that corresponds  
536 to 1/3 rd of maximum fluorescent intensity (usually around 7-8 cycles). The full libraries were  
537 then amplified for the corresponding number of cycles (determined in previous step) for each  
538 sample. The libraries were again then purified with size selection (<600 bp) using Ampure XP  
539 magnetic beads according to manufacturer's protocol. Libraries were quantified using Qubit  
540 DNA HS kit and for quality control, 1 µl of each sample was run on Bioanalyzer High Sensitivity  
541 DNA Chip. 4 nM of all libraries were pooled and 1.5 pM were analyzed on Illumina NextSeq500  
542 (500/550 High Output v2 kit - 150 cycles).

543  
544 The raw paired-end reads were first trimmed for Nextera transposase adapter sequences using  
545 Trimmomatic (v0.32) in palindrome mode with default settings except  
546 'ILLUMINACLIP:2:30:10:1:true MINLEN:25'. FastQC of reads before and after trimming  
547 confirmed the removal of any 3' adapter sequences, while also clearly showing the known  
548 insertion Tn5 motif in the 5'-ends. The trimmed PE reads were mapped to the hg19 assembly  
549 (canonical chromosomes only) using bowtie2 v.2.2.9 with default settings except '-k 2 -X 2000 --  
550 no-mixed --no-discordant'. After sorting ('SortSam') and labeling duplicates ('MarkDuplicates')  
551 with Picard tools (v. 2.6.0-27-g915ffa7-SNAPSHOT) and adding a 'NH' tag (number of reported  
552 alignments), reads were filtered to exclude unmapped, multimapping and mitochondrial reads  
553 ('samtools view -f 2 -F 4' and custom filter). The filtered bam files were converted to bed format  
554 using bedtools 'bamtoBED' (v2.26.0-92-g88cd6c5), and read start and stop coordinates were  
555 finally adjusted by +5bp and -4bp respectively to adjust for Tn5 binding properties as  
556 previously described <sup>15</sup>.

557  
558 ATAC-seq peaks were identified individually for each set of data using macs2 (v2.1.1.20160309)  
559 <sup>60</sup> callpeak broad -f BAMPE -t \$f -g hs -q 0.05, intersected using bedtools <sup>61</sup> multiinter -I, and  
560 regions positive in at least two sets were merged within 1 kbp of each other using bedtools

561 merge -i 1000. Subsequent handling and visualization was done using EaSeq (v1.05) <sup>62</sup>. Values  
562 in scatter plots were quantified within a 1 kbp window surrounding the center of each region  
563 using the 'Quantify-tool', quantile normalized using the 'Normalize-tool', and averaged for all  
564 replicates in Microsoft Excel. Tracks were visualized using the 'FillTrack'-tool and replicates  
565 were made transparent and superimposed in Adobe Illustrator.

566

#### 567 **Data Availability**

568 All data are available from the corresponding authors upon reasonable request.

569

## 570 References

- 571 1. Nagano, T. *et al.* Cell-cycle dynamics of chromosomal organization at single-cell  
572 resolution. *Nature* **547**, 61-67 (2017).
- 573 2. Bannister, A.J. & Kouzarides, T. Regulation of chromatin by histone modifications. *Cell*  
574 *research* **21**, 381-395 (2011).
- 575 3. Rothbart, S.B. & Strahl, B.D. Interpreting the language of histone and DNA modifications.  
576 *Biochimica et biophysica acta* **1839**, 627-643 (2014).
- 577 4. Woodcock, C.L. & Ghosh, R.P. Chromatin higher-order structure and dynamics. *Cold*  
578 *Spring Harbor perspectives in biology* **2**, a000596 (2010).
- 579 5. Hendzel, M.J. *et al.* Mitosis-specific phosphorylation of histone H3 initiates primarily  
580 within pericentromeric heterochromatin during G2 and spreads in an ordered fashion  
581 coincident with mitotic chromosome condensation. *Chromosoma* **106**, 348-360 (1997).
- 582 6. Doenecke, D. Chromatin dynamics from S-phase to mitosis: contributions of histone  
583 modifications. *Cell Tissue Res* **356**, 467-475 (2014).
- 584 7. Wang, F. & Higgins, J.M. Histone modifications and mitosis: countermarks, landmarks,  
585 and bookmarks. *Trends Cell Biol* **23**, 175-184 (2013).
- 586 8. Dimitrova, D.S., Prokhorova, T.A., Blow, J.J., Todorov, I.T. & Gilbert, D.M. Mammalian  
587 nuclei become licensed for DNA replication during late telophase. *Journal of cell science*  
588 **115**, 51-59 (2002).
- 589 9. Prioleau, M.N. & MacAlpine, D.M. DNA replication origins-where do we begin? *Genes &*  
590 *development* **30**, 1683-1697 (2016).
- 591 10. Mechali, M., Yoshida, K., Coulombe, P. & Pasero, P. Genetic and epigenetic determinants  
592 of DNA replication origins, position and activation. *Curr Opin Genet Dev* **23**, 124-131  
593 (2013).
- 594 11. Jorgensen, S. *et al.* The histone methyltransferase SET8 is required for S-phase  
595 progression. *The Journal of cell biology* **179**, 1337-1345 (2007).
- 596 12. Tardat, M., Murr, R., Herceg, Z., Sardet, C. & Julien, E. PR-Set7-dependent lysine  
597 methylation ensures genome replication and stability through S phase. *The Journal of*  
598 *cell biology* **179**, 1413-1426 (2007).
- 599 13. Oda, H. *et al.* Monomethylation of histone H4-lysine 20 is involved in chromosome  
600 structure and stability and is essential for mouse development. *Molecular and cellular*  
601 *biology* **29**, 2278-2295 (2009).
- 602 14. Jorgensen, S., Schotta, G. & Sorensen, C.S. Histone H4 lysine 20 methylation: key player in  
603 epigenetic regulation of genomic integrity. *Nucleic acids research* **41**, 2797-2806 (2013).
- 604 15. Buenrostro, J.D., Giresi, P.G., Zaba, L.C., Chang, H.Y. & Greenleaf, W.J. Transposition of  
605 native chromatin for fast and sensitive epigenomic profiling of open chromatin, DNA-  
606 binding proteins and nucleosome position. *Nat Methods* **10**, 1213-1218 (2013).



- 607 16. Lleres, D., James, J., Swift, S., Norman, D.G. & Lamond, A.I. Quantitative analysis of  
608 chromatin compaction in living cells using FLIM-FRET. *The Journal of cell biology* **187**,  
609 481-496 (2009).
- 610 17. Lu, X. *et al.* The effect of H3K79 dimethylation and H4K20 trimethylation on nucleosome  
611 and chromatin structure. *Nature structural & molecular biology* **15**, 1122-1124 (2008).
- 612 18. Kalashnikova, A.A., Porter-Goff, M.E., Muthurajan, U.M., Luger, K. & Hansen, J.C. The role  
613 of the nucleosome acidic patch in modulating higher order chromatin structure. *J R Soc*  
614 *Interface* **10**, 20121022 (2013).
- 615 19. Houston, S.I. *et al.* Catalytic function of the PR-Set7 histone H4 lysine 20  
616 monomethyltransferase is essential for mitotic entry and genomic stability. *The Journal*  
617 *of biological chemistry* **283**, 19478-19488 (2008).
- 618 20. Toth, K.F. *et al.* Trichostatin A-induced histone acetylation causes decondensation of  
619 interphase chromatin. *Journal of cell science* **117**, 4277-4287 (2004).
- 620 21. Ricci, M.A., Manzo, C., Garcia-Parajo, M.F., Lakadamyali, M. & Cosma, M.P. Chromatin  
621 fibers are formed by heterogeneous groups of nucleosomes in vivo. *Cell* **160**, 1145-1158  
622 (2015).
- 623 22. Richter, K., Nessling, M. & Lichter, P. Experimental evidence for the influence of  
624 molecular crowding on nuclear architecture. *Journal of cell science* **120**, 1673-1680  
625 (2007).
- 626 23. Albiez, H. *et al.* Chromatin domains and the interchromatin compartment form  
627 structurally defined and functionally interacting nuclear networks. *Chromosome*  
628 *research : an international journal on the molecular, supramolecular and evolutionary*  
629 *aspects of chromosome biology* **14**, 707-733 (2006).
- 630 24. Eskeland, R. *et al.* Ring1B compacts chromatin structure and represses gene expression  
631 independent of histone ubiquitination. *Molecular cell* **38**, 452-464 (2010).
- 632 25. Gillespie, P.J., Li, A. & Blow, J.J. Reconstitution of licensed replication origins on Xenopus  
633 sperm nuclei using purified proteins. *BMC biochemistry* **2**, 15 (2001).
- 634 26. Remus, D. *et al.* Concerted loading of Mcm2-7 double hexamers around DNA during DNA  
635 replication origin licensing. *Cell* **139**, 719-730 (2009).
- 636 27. Evrin, C. *et al.* A double-hexameric MCM2-7 complex is loaded onto origin DNA during  
637 licensing of eukaryotic DNA replication. *Proceedings of the National Academy of Sciences*  
638 *of the United States of America* **106**, 20240-20245 (2009).
- 639 28. Beck, D.B., Oda, H., Shen, S.S. & Reinberg, D. PR-Set7 and H4K20me1: at the crossroads of  
640 genome integrity, cell cycle, chromosome condensation, and transcription. *Genes &*  
641 *development* **26**, 325-337 (2012).
- 642 29. Tardat, M. *et al.* The histone H4 Lys 20 methyltransferase PR-Set7 regulates replication  
643 origins in mammalian cells. *Nature cell biology* **12**, 1086-1093 (2010).
- 644 30. Tenca, P. *et al.* Cdc7 is an active kinase in human cancer cells undergoing replication  
645 stress. *The Journal of biological chemistry* **282**, 208-215 (2007).



- 646 31. Tsuji, T., Ficarro, S.B. & Jiang, W. Essential role of phosphorylation of MCM2 by  
647 Cdc7/Dbf4 in the initiation of DNA replication in mammalian cells. *Molecular biology of*  
648 *the cell* **17**, 4459-4472 (2006).
- 649 32. Weinreich, M. Molecular biology: DNA replication reconstructed. *Nature* **519**, 418-419  
650 (2015).
- 651 33. Bunting, S.F. *et al.* 53BP1 inhibits homologous recombination in Brca1-deficient cells by  
652 blocking resection of DNA breaks. *Cell* **141**, 243-254 (2010).
- 653 34. Kousholt, A.N. *et al.* CtIP-dependent DNA resection is required for DNA damage  
654 checkpoint maintenance but not initiation. *The Journal of cell biology* **197**, 869-876  
655 (2012).
- 656 35. Siddiqui, K., On, K.F. & Diffley, J.F. Regulating DNA replication in eukarya. *Cold Spring*  
657 *Harbor perspectives in biology* **5** (2013).
- 658 36. Yeeles, J.T., Deegan, T.D., Janska, A., Early, A. & Diffley, J.F. Regulated eukaryotic DNA  
659 replication origin firing with purified proteins. *Nature* **519**, 431-435 (2015).
- 660 37. Geraghty, D.S., Ding, M., Heintz, N.H. & Pederson, D.S. Premature structural changes at  
661 replication origins in a yeast minichromosome maintenance (MCM) mutant. *The Journal*  
662 *of biological chemistry* **275**, 18011-18021 (2000).
- 663 38. Poh, W.T., Chadha, G.S., Gillespie, P.J., Kaldis, P. & Blow, J.J. *Xenopus* Cdc7 executes its  
664 essential function early in S phase and is counteracted by checkpoint-regulated protein  
665 phosphatase 1. *Open biology* **4**, 130138 (2014).
- 666 39. Hughes, S. *et al.* Crystal structure of human CDC7 kinase in complex with its activator  
667 DBF4. *Nature structural & molecular biology* **19**, 1101-1107 (2012).
- 668 40. Alver, R.C., Chadha, G.S., Gillespie, P.J. & Blow, J.J. Reversal of DDK-Mediated MCM  
669 Phosphorylation by Rif1-PP1 Regulates Replication Initiation and Replisome Stability  
670 Independently of ATR/Chk1. *Cell Rep* **18**, 2508-2520 (2017).
- 671 41. Hansen, J.C. Conformational dynamics of the chromatin fiber in solution: determinants,  
672 mechanisms, and functions. *Annu Rev Biophys Biomol Struct* **31**, 361-392 (2002).
- 673 42. Dorigo, B., Schalch, T., Bystricky, K. & Richmond, T.J. Chromatin fiber folding:  
674 requirement for the histone H4 N-terminal tail. *Journal of molecular biology* **327**, 85-96  
675 (2003).
- 676 43. Luger, K., Mader, A.W., Richmond, R.K., Sargent, D.F. & Richmond, T.J. Crystal structure of  
677 the nucleosome core particle at 2.8 Å resolution. *Nature* **389**, 251-260 (1997).
- 678 44. Dorigo, B. *et al.* Nucleosome arrays reveal the two-start organization of the chromatin  
679 fiber. *Science* **306**, 1571-1573 (2004).
- 680 45. Kan, P.Y., Caterino, T.L. & Hayes, J.J. The H4 tail domain participates in intra- and  
681 internucleosome interactions with protein and DNA during folding and oligomerization  
682 of nucleosome arrays. *Molecular and cellular biology* **29**, 538-546 (2009).
- 683 46. Blacketer, M.J., Feely, S.J. & Shogren-Knaak, M.A. Nucleosome interactions and stability in  
684 an ordered nucleosome array model system. *The Journal of biological chemistry* **285**,  
685 34597-34607 (2010).

- 686 47. Barrington, C., Pezic, D. & Hadjur, S. Chromosome structure dynamics during the cell  
687 cycle: a structure to fit every phase. *The EMBO journal* **36**, 2661-2663 (2017).
- 688 48. Uhlmann, F. SMC complexes: from DNA to chromosomes. *Nature reviews. Molecular cell*  
689 *biology* **17**, 399-412 (2016).
- 690 49. Schalbetter, S.A. *et al.* SMC complexes differentially compact mitotic chromosomes  
691 according to genomic context. *Nature cell biology* **19**, 1071-1080 (2017).
- 692 50. Hirano, T. Condensin-Based Chromosome Organization from Bacteria to Vertebrates.  
693 *Cell* **164**, 847-857 (2016).
- 694 51. Kurat, C.F., Yeeles, J.T., Patel, H., Early, A. & Diffley, J.F. Chromatin Controls DNA  
695 Replication Origin Selection, Lagging-Strand Synthesis, and Replication Fork Rates.  
696 *Molecular cell* **65**, 117-130 (2017).
- 697 52. Devbhandari, S., Jiang, J., Kumar, C., Whitehouse, I. & Remus, D. Chromatin Constrains the  
698 Initiation and Elongation of DNA Replication. *Molecular cell* **65**, 131-141 (2017).
- 699 53. Eaton, M.L., Galani, K., Kang, S., Bell, S.P. & MacAlpine, D.M. Conserved nucleosome  
700 positioning defines replication origins. *Genes & development* **24**, 748-753 (2010).
- 701 54. Kuo, A.J. *et al.* The BAH domain of ORC1 links H4K20me2 to DNA replication licensing  
702 and Meier-Gorlin syndrome. *Nature* **484**, 115-119 (2012).
- 703 55. Nair, N., Shoaib, M. & Sorensen, C.S. Chromatin Dynamics in Genome Stability: Roles in  
704 Suppressing Endogenous DNA Damage and Facilitating DNA Repair. *Int J Mol Sci* **18**  
705 (2017).
- 706 56. Brustel, J. *et al.* Histone H4K20 tri-methylation at late-firing origins ensures timely  
707 heterochromatin replication. *The EMBO journal* **36**, 2726-2741 (2017).
- 708 57. Mendez, J. & Stillman, B. Chromatin association of human origin recognition complex,  
709 cdc6, and minichromosome maintenance proteins during the cell cycle: assembly of  
710 prereplication complexes in late mitosis. *Molecular and cellular biology* **20**, 8602-8612  
711 (2000).
- 712 58. Shoaib, M. *et al.* PUB-NChIP--"in vivo biotinylation" approach to study chromatin in  
713 proximity to a protein of interest. *Genome research* **23**, 331-340 (2013).
- 714 59. Fahrenkrog, B. *et al.* Domain-specific antibodies reveal multiple-site topology of Nup153  
715 within the nuclear pore complex. *Journal of structural biology* **140**, 254-267 (2002).
- 716 60. Zhang, Y. *et al.* Model-based analysis of ChIP-Seq (MACS). *Genome Biol* **9**, R137 (2008).
- 717 61. Quinlan, A.R. & Hall, I.M. BEDTools: a flexible suite of utilities for comparing genomic  
718 features. *Bioinformatics* **26**, 841-842 (2010).
- 719 62. Lerdrup, M., Johansen, J.V., Agrawal-Singh, S. & Hansen, K. An interactive environment  
720 for agile analysis and visualization of ChIP-sequencing data. *Nature structural &*  
721 *molecular biology* **23**, 349-357 (2016).  
722
- 723

724 **ACKNOWLEDGMENTS**

725 We are grateful to S. Jørgensen and C. Colding for assistance in the early stages of the project  
726 and to Yasuko Antoku and Kasper Nørskov Kragh for immunofluorescence analysis assistance.  
727 We thank Ursula Sauder and Vesna Oliveri for electron microscopy expert technical assistance.  
728 We thank Brian Larsen for his help in Comet assay and Heike Ilona Rösner for useful scientific  
729 discussions and advice. We also thank Sung-Bao Lee for help in setting up MNase assay. We  
730 thank Montpellier Ressources Imagerie (MRI) for assistance with FLIM-FRET microscopy. CSS,  
731 MS and DW are funded by The Novo Nordisk Foundation (CSS), The Danish Cancer Society  
732 (CSS), The Lundbeck Foundation (CSS), and The Danish Medical Research Council (CSS), Swiss  
733 National Science Foundation (DW) and Villum Foundation (MS). BF is funded by FNRS Belgium  
734 and PJG and JJB are funded by Cancer Research UK (grant C303/A14301). FI and EJ are funded  
735 by the EPIG2013-13 grant from the French Plan-Cancer and Labex EpiGenMed. FI was  
736 supported by a PhD fellowship from the French “Ligue Contre le Cancer” and “fondation pour la  
737 recherche médicale”. DL was supported by a Cancéropole GSO-Emergence grant (2014-E17)  
738 and CNRS.  
739  
740

741 **AUTHOR CONTRIBUTIONS**

742 MS, DW and PJG, designed, performed and analysed the experiments. FI and DL generated the  
743 H4K20 mutants in 2FP-expressing U2OS cells and performed and analysed the FLIM-FRET  
744 experiments. ML and JVJ analysed the ATAC-seq data. BF performed electron microscopy  
745 analysis. CSS, KH, EJ and JJB directed the project. CSS and MS conceived and designed the  
746 project. MS, CSS and EJ wrote the manuscript.

747

748 **COMPETING INTERESTS STATEMENT**

749 The authors declare no competing interest.

750

751 **FIGURE LEGENDS**

752

753 **Figure 1: SET8 and H4K20 methylation regulate ground-state chromatin compaction in**  
754 **cells exiting mitosis**

- 755 a) Design of the chromatin compaction experiment. U2OS cells were synchronized with  
756 double thymidine block and Control & SET8 siRNA transfected 6 hours before G1/S  
757 release. Cells were then blocked in mitosis with Nocodazole for 4 hours (T0) and  
758 released into G1 phase for 5 hours (T5). MNase digestion was performed (as described  
759 in materials and methods) on cells arrested in mitosis and compared with those  
760 released in G1 phase. Thymidine containing methyl-<sup>14</sup>C was added throughout  
761 experiment.
- 762 b) Cells from (Fig. 1a) were fixed and stained with phospho-Histone H3S10 antibody and  
763 propidium iodide (PI) followed by flow cytometry analysis.
- 764 c) Immunoblots of total cell lysates prepared from the samples in (Fig. 1a) with the  
765 indicated antibodies. \* represents a non-specific band.
- 766 d) Graph showing MNase digestion profile. Levels of methyl-<sup>14</sup>C in the supernatant  
767 indicates the degree of chromatin decompaction over time when incubated with MNase.  
768 0.3 Million cells were taken for each time point in each condition.
- 769 e) U2OS cells stably expressing H2B-GFP alone (U2OS<sub>H2B-GFP</sub>) or with mCherry tagged  
770 histone H2B (U2OS<sub>H2B-2FPs</sub>) were synchronized with single thymidine block (2 mM). Cells  
771 were treated with either control or SET8 siRNA during the block. FRET measurements  
772 were taken 24 hours after release (Bars, 10 μm).
- 773 f) Quantification of the FLIM-FRET chromatin compaction assay. FRET percentage ±SD,  
774 n>30 nuclei). \*\*\*p<0.001, \*\*p<0.01 (ANOVA), ns (not significant).
- 775 g) U2OS cells were synchronized with a double thymidine block and siRNA transfected 6  
776 hours before G1/S release. Cells were fixed at 15 h post release for transmission  
777 electron microscope visualization as described in materials and methods.

- 778 h) Quantification of the average pixel intensity  $\pm$  SD ( $n>15$ ) nuclei fixed for electron  
779 microscope visualization in (1g).  $**p<0.01$  (unpaired *t*-test).
- 780 i) U2OS cells stably expressing H2B-GFP alone (U2OS<sub>H2B-GFP</sub>) or with mCherry -H2B  
781 (U2OS<sub>H2B-2FPs</sub>) were transduced with FLAG-tagged Histone H4WT or H4K20A mutant.  
782 Mock transduced cells were taken as control. FRET measurements were taken for all the  
783 three samples (Bars, 10  $\mu$ m).
- 784 j) Quantification of the mean FRET levels in Mock, H4K20WT and H4K20A expressing  
785 cells. FRET percentage  $\pm$ SD,  $n>30$  nuclei. ns (not significant),  $***p<0.001$  (ANOVA).

786

787 **Figure 2: Maintenance of ground-state chromatin compaction ensures genome integrity**

- 788 a) Design of the experiment. U2OS cells synchronized by double thymidine block were  
789 transfected with Control and SET8 siRNA. Cells were released into thymidine free  
790 medium and harvested at the indicated time points.
- 791 b) Cells from (2a) were fixed and stained with  $\gamma$ H2A.X antibody and propidium iodide (PI)  
792 followed by flow cytometry analysis.
- 793 c) Bars represent percentage of  $\gamma$ H2A.X positive U2OS cells harvested at 15 hours post  
794 G1/S release. Average  $\pm$  SD of 3 independent experiments.  $****p<0.0001$  (unpaired *t*-  
795 test).  $n>20,000$  in each experiment.
- 796 d) U2OS cells synchronized as illustrated in (2a), were harvested at 15 hours post G1/S  
797 release and immunoblotted with the indicated antibodies.
- 798 e) U2OS cells synchronized and siRNA transfected as in (2a) were fixed at 15 hours post  
799 G1/S release and stained with  $\gamma$ H2A.X antibody. Nuclei were counterstained with DAPI.  
800 (Bar, 10  $\mu$ m).
- 801 f) U2OS cells synchronized and siRNA transfected as in (2a) were prepared for single-cell  
802 electrophoresis in neutral electrophoresis buffer at 15 hours post G1/S release.
- 803 g) Relative comet-tail moments from experiments in Fig. 2f plotted as means and S.E.M.  
804 Average  $\pm$  SD of 2 independent experiments.  $*p<0.05$  (unpaired *t*-test).  $n>55$ .

- 805 h) U2OS cells expressing Dox inducible FLAG-HA tagged histone H4-wild type (H4K20WT)  
806 or histone H4 lysine 20 to alanine (H4K20A) mutant were synchronized with double  
807 thymidine block. Cells were fixed at 15 hours post G1/S release and stained with  $\gamma$ H2A.X  
808 antibody and propidium iodide (PI) followed by flow cytometry analysis.
- 809 i) Bars represent percentage of  $\gamma$ H2A.X positive cells from (2h). Average  $\pm$  SD of 3  
810 independent experiments. \* $p$ <0.05, \*\* $p$ <0.01 (ANOVA).  $n$ >20,000 in each experiment.
- 811 j) U2OS cells synchronized and siRNA transfected as in (2a), were mock and sucrose  
812 treated (125 mM) at 12 hours post G1/S release and were fixed at 15 hours post G1/S  
813 release. Bars represent percentage of  $\gamma$ H2A.X positive cells in the indicated samples  
814 (average  $\pm$  SD of 3 independent experiments). \*\*\*\* $p$ <0.0001, ##### $p$ <0.0001 (unpaired  $t$ -  
815 test).  $n$ >20,000 in each experiment.
- 816 k) U2OS cells were transfected with mCherry-tagged human wild-type RNF2 (RING1b) and  
817 were double thymidine synchronized and transfected with siControl and siSet8 as  
818 previously. Cells were fixed at 15 hours post G1/S release and stained with  $\gamma$ H2A.X  
819 antibody. Cells were counterstained with DAPI. (Bar, 10  $\mu$ m).

820

821 **Figure 3: Chromatin compaction threshold restricts excessive loading of replication**  
822 **licensing factors**

- 823 a) U2OS cells were synchronized with double thymidine block, transfected with either  
824 siControl or siSET8 6 hours before G1/S release and fixed at 15 h post release. Cells  
825 were pre-extracted in CSK buffer containing 0,5% triton and immunostained with the  
826 indicated antibodies. Cells were counterstained with DAPI. (Bar, 10  $\mu$ m).
- 827 b) Scatter plot showing the quantification of ORC1 intensity from cells in (Fig. 3a) where  
828 mean  $\pm$  SD is indicated.  $n$ >150, \*\*\*\* $p$ <0.0001 (unpaired  $t$ -test).  $n$ >280.
- 829 c) Scatter plot showing the quantification of MCM2 intensity from cells in (Fig. 3a) where  
830 mean  $\pm$  SD is indicated.  $n$ >150, \*\*\*\* $p$ <0.0001 (unpaired  $t$ -test).  $n$ >280.



- 831 d) Chromatin fraction was prepared from synchronized U2OS cells depleted as in (Fig. 3a),  
832 harvested at 15 h and immunoblotted with the indicated antibodies.
- 833 e) Chromatin was prepared from cells synchronized and transfected with siRNAs as in (Fig.  
834 3a), treated with sucrose at 12 h post G1/S release and harvested at 15 h. Samples were  
835 blotted with the indicated antibodies.
- 836 f) U2OS cells expressing Dox inducible FLAG-HA tagged histone H4WT or H4K20A mutant  
837 were synchronized as in (Fig. 3a) and fixed at 15 h post release. Cells were pre-extracted  
838 and immunostained with the indicated antibody as well as DAPI for DNA. (Bar, 10  $\mu$ m).
- 839 g) Scatter plot showing the quantification of ORC1 intensity from HA-positive cells in (Fig.  
840 3f) where mean  $\pm$  SD is indicated.  $n > 250$ ,  $**p < 0.01$  (unpaired *t*-test).
- 841 h) U2OS cells expressing Dox inducible FLAG-HA tagged histone H4WT or H4K20A mutant  
842 were synchronized with double thymidine block as in (Fig. 3a) and fixed at 15 h post  
843 release. Cells were pre-extracted and immunostained with the indicated antibody as  
844 well as DAPI for DNA. (Bar, 10  $\mu$ m).
- 845 i) Scatter plot showing the quantification of MCM2 intensity from HA-positive cells in (Fig.  
846 3h) where mean  $\pm$  SD is indicated.  $n > 180$ ,  $****p < 0.0001$  (unpaired *t*-test).

847

848 **Figure 4: Chromatin-mediated suppression of the MCM2-7 complex promotes genome**  
849 **integrity**

- 850 a) U2OS cells synchronized by double thymidine block were transfected with Control and  
851 SET8 siRNA. Cells were released into BrdU containing medium from G1/S boundary and  
852 were mock or sucrose treated at 12 hours post G1/S release. Cells were then fixed at 15  
853 hours post G1/S release and were immunostained with the indicated antibody as well as  
854 DAPI for DNA. (Bar, 10  $\mu$ m).
- 855 b) Scatter plot showing the quantification of BrdU intensity (Fig. 4a) where mean  $\pm$  SD is  
856 indicated.  $n > 230$ ,  $****p < 0.0001$  (ANOVA).

- 857 c) U2OS cells were synchronized, siRNA transfected, treated with sucrose and fixed as in  
858 (Fig. 4a). Samples were immunostained with an RPA2 antibody after pre-extraction.  
859 Scatter plot showing the quantification of RPA2 intensity, where mean  $\pm$  SD is indicated.  
860  $n > 150$ , \*\*\*\* $p < 0.0001$  (ANOVA).
- 861 d) U2OS cells were transfected with siMCM7 and synchronized with double thymidine  
862 block. SET8 was depleted 6 hours before G1/S release. Cells were fixed at 15 hours post  
863 release and processed for immunofluorescence staining with the indicated antibody as  
864 well as DAPI for DNA. (Bar, 30  $\mu$ m).
- 865 e) Scatter plot showing the quantification of  $\gamma$ H2A.X intensity from cells in (Fig. 4d) where  
866 median and interquartile range is indicated.  $n > 50$ , \*\*\*\* $p < 0.0001$  (ANOVA).
- 867 f) U2OS cells were synchronized and transfected with control or SET8 at G1/S boundary as  
868 in (Fig. 4a). DDKi inhibitors (PHA-767491 and XL413) were added at 11 hours post  
869 release from G1/S boundary. Cells were then collected at 15 hours post release and  
870 processed for FACS staining with indicated antibodies. Bars representing percentage of  
871  $\gamma$ H2A.X positive cells in indicated samples (average  $\pm$  SD of 3 independent experiments).  
872 \*\*\*\* $p < 0.0001$  (unpaired *t*-test).  $n > 20,000$  in each experiment.
- 873 g) Illustrative plot details the dynamics of chromatin compaction/decompaction over  
874 different phases of cell cycle. Loss of SET8 and H4K20me leads to a notable reduction in  
875 chromatin compaction status in cells exiting mitosis.
- 876 h) Illustrative plot details the dynamics of loading of replication licensing factors. In late  
877 mitosis, the licensing starts with loading of ORC complex which promotes loading of  
878 MCM2-7 complex throughout G1 phase. Loss of SET8 and H4K20me favors excessive  
879 loading of ORC and MCM2-7 complexes in daughter cells.
- 880
- 881

## Figure 1: SET8 and H4K20 methylation regulate ground-state chromatin compaction in cells exiting mitosis

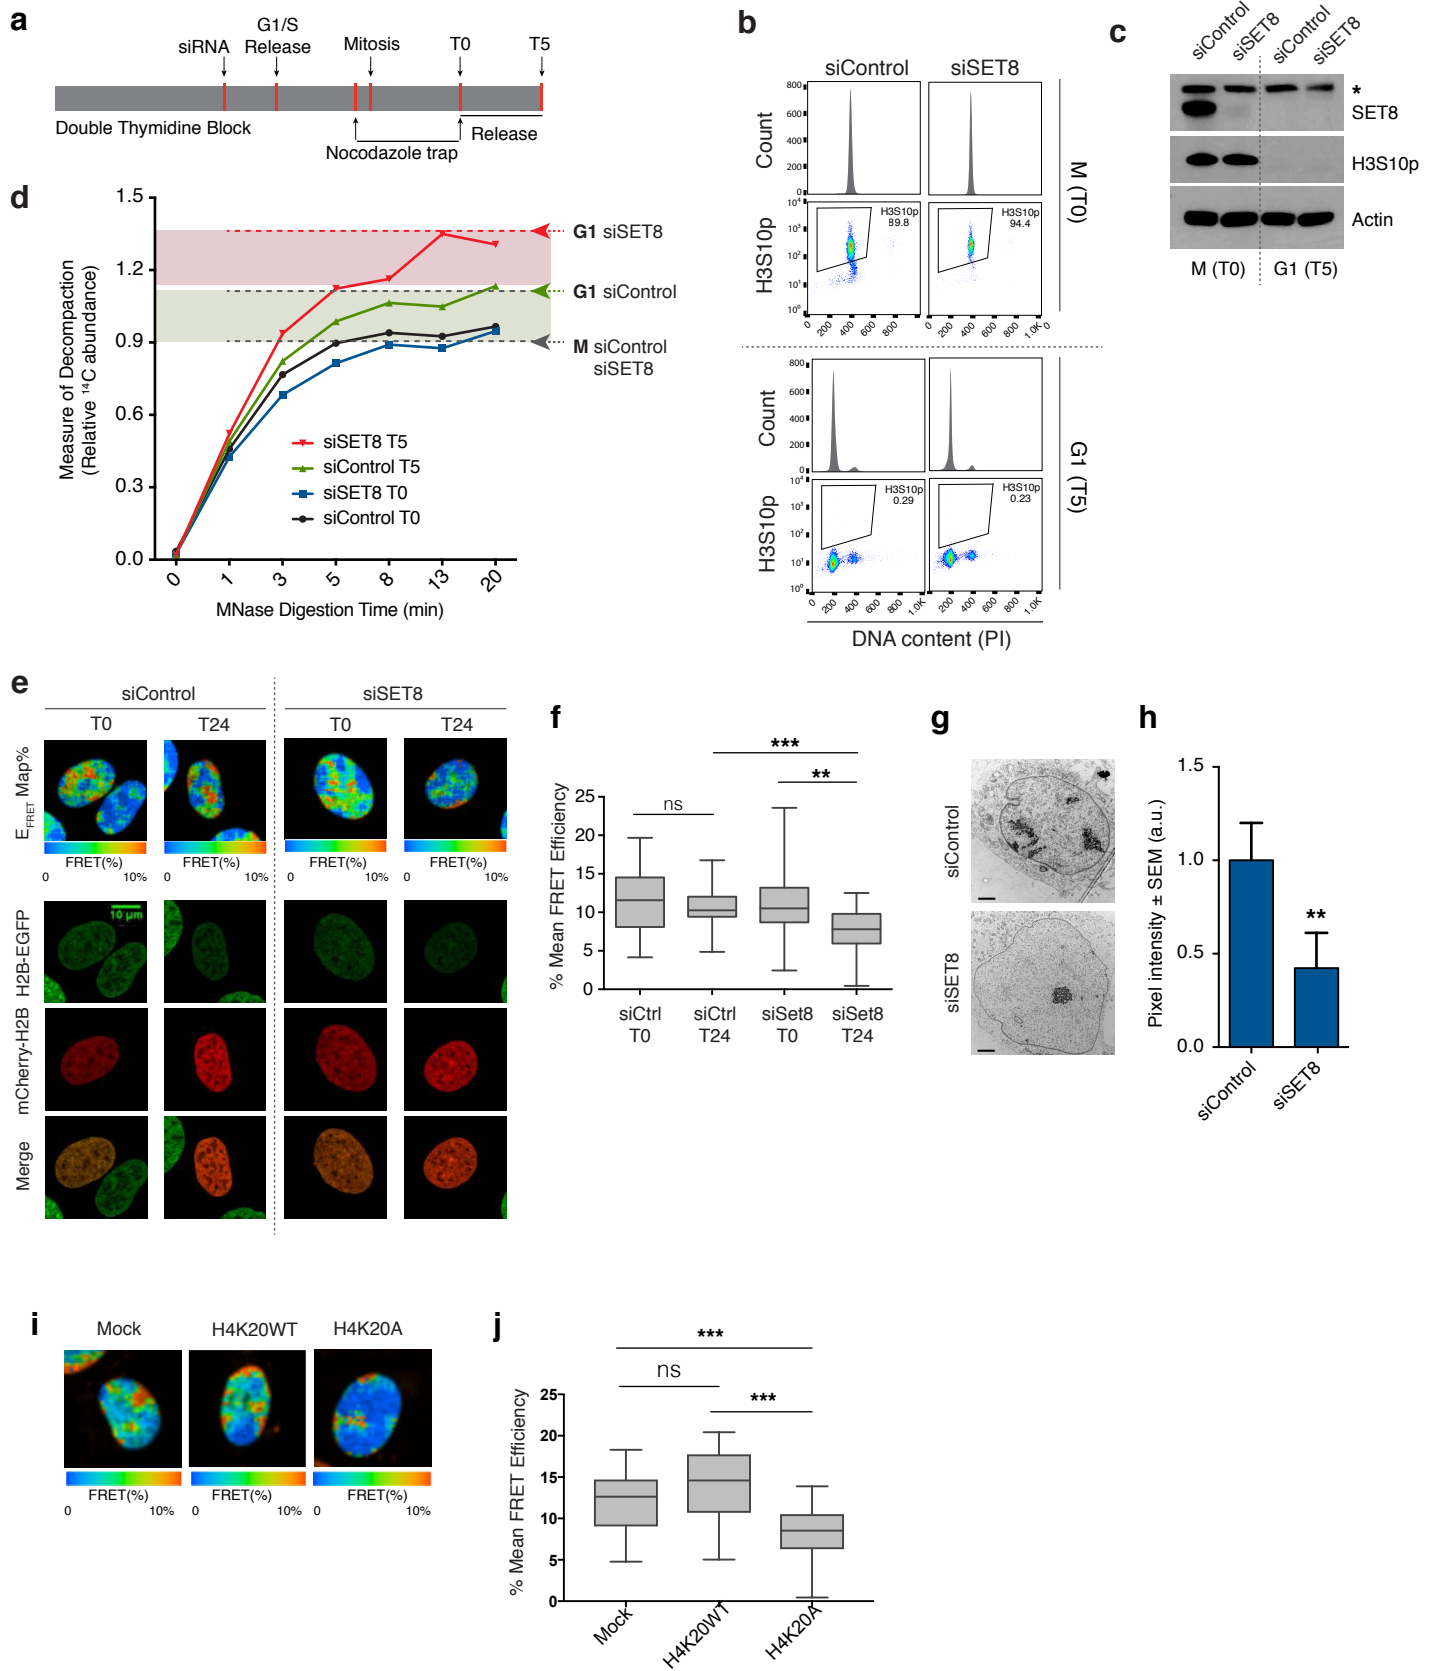

## Figure 2: Maintenance of ground-state chromatin compaction ensures genome integrity

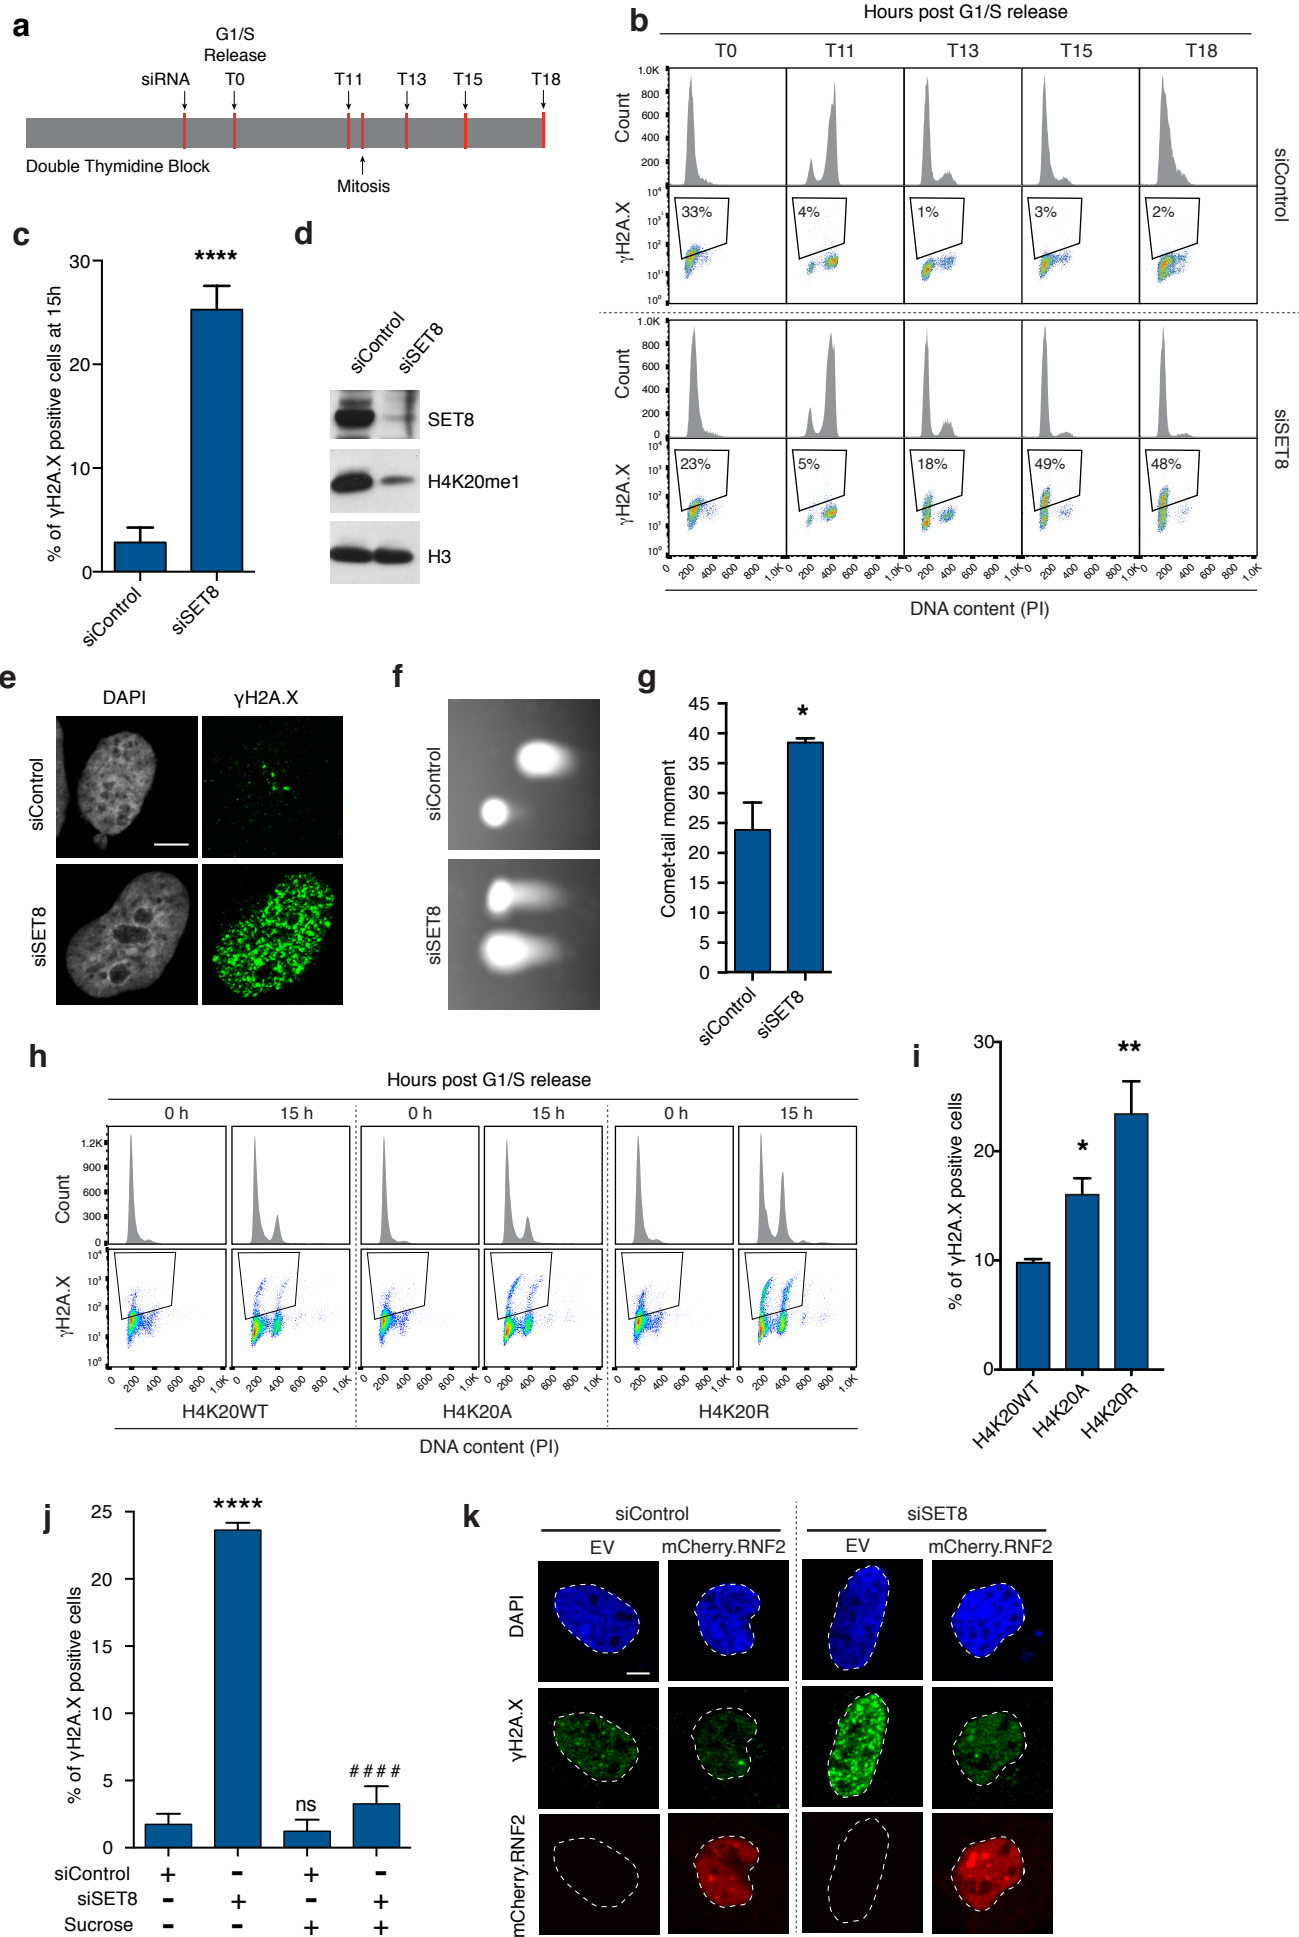

### Figure 3: Chromatin compaction threshold restricts excessive loading of replication licensing factors

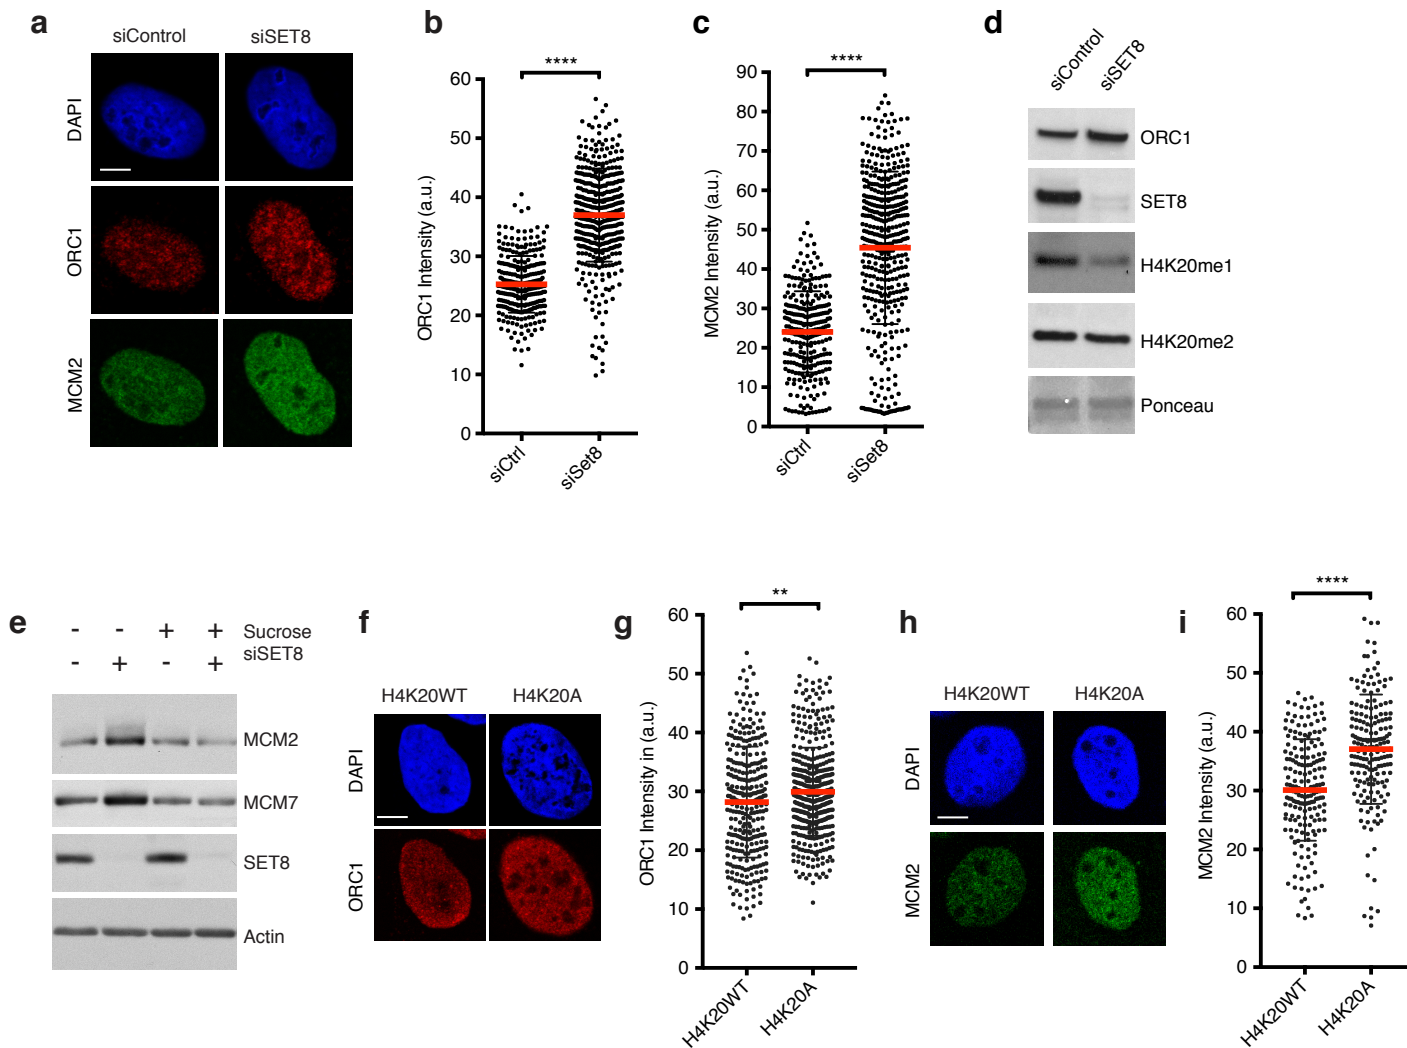

**Figure 4: Chromatin-mediated suppression of the MCM2-7 complex promotes genome integrity**

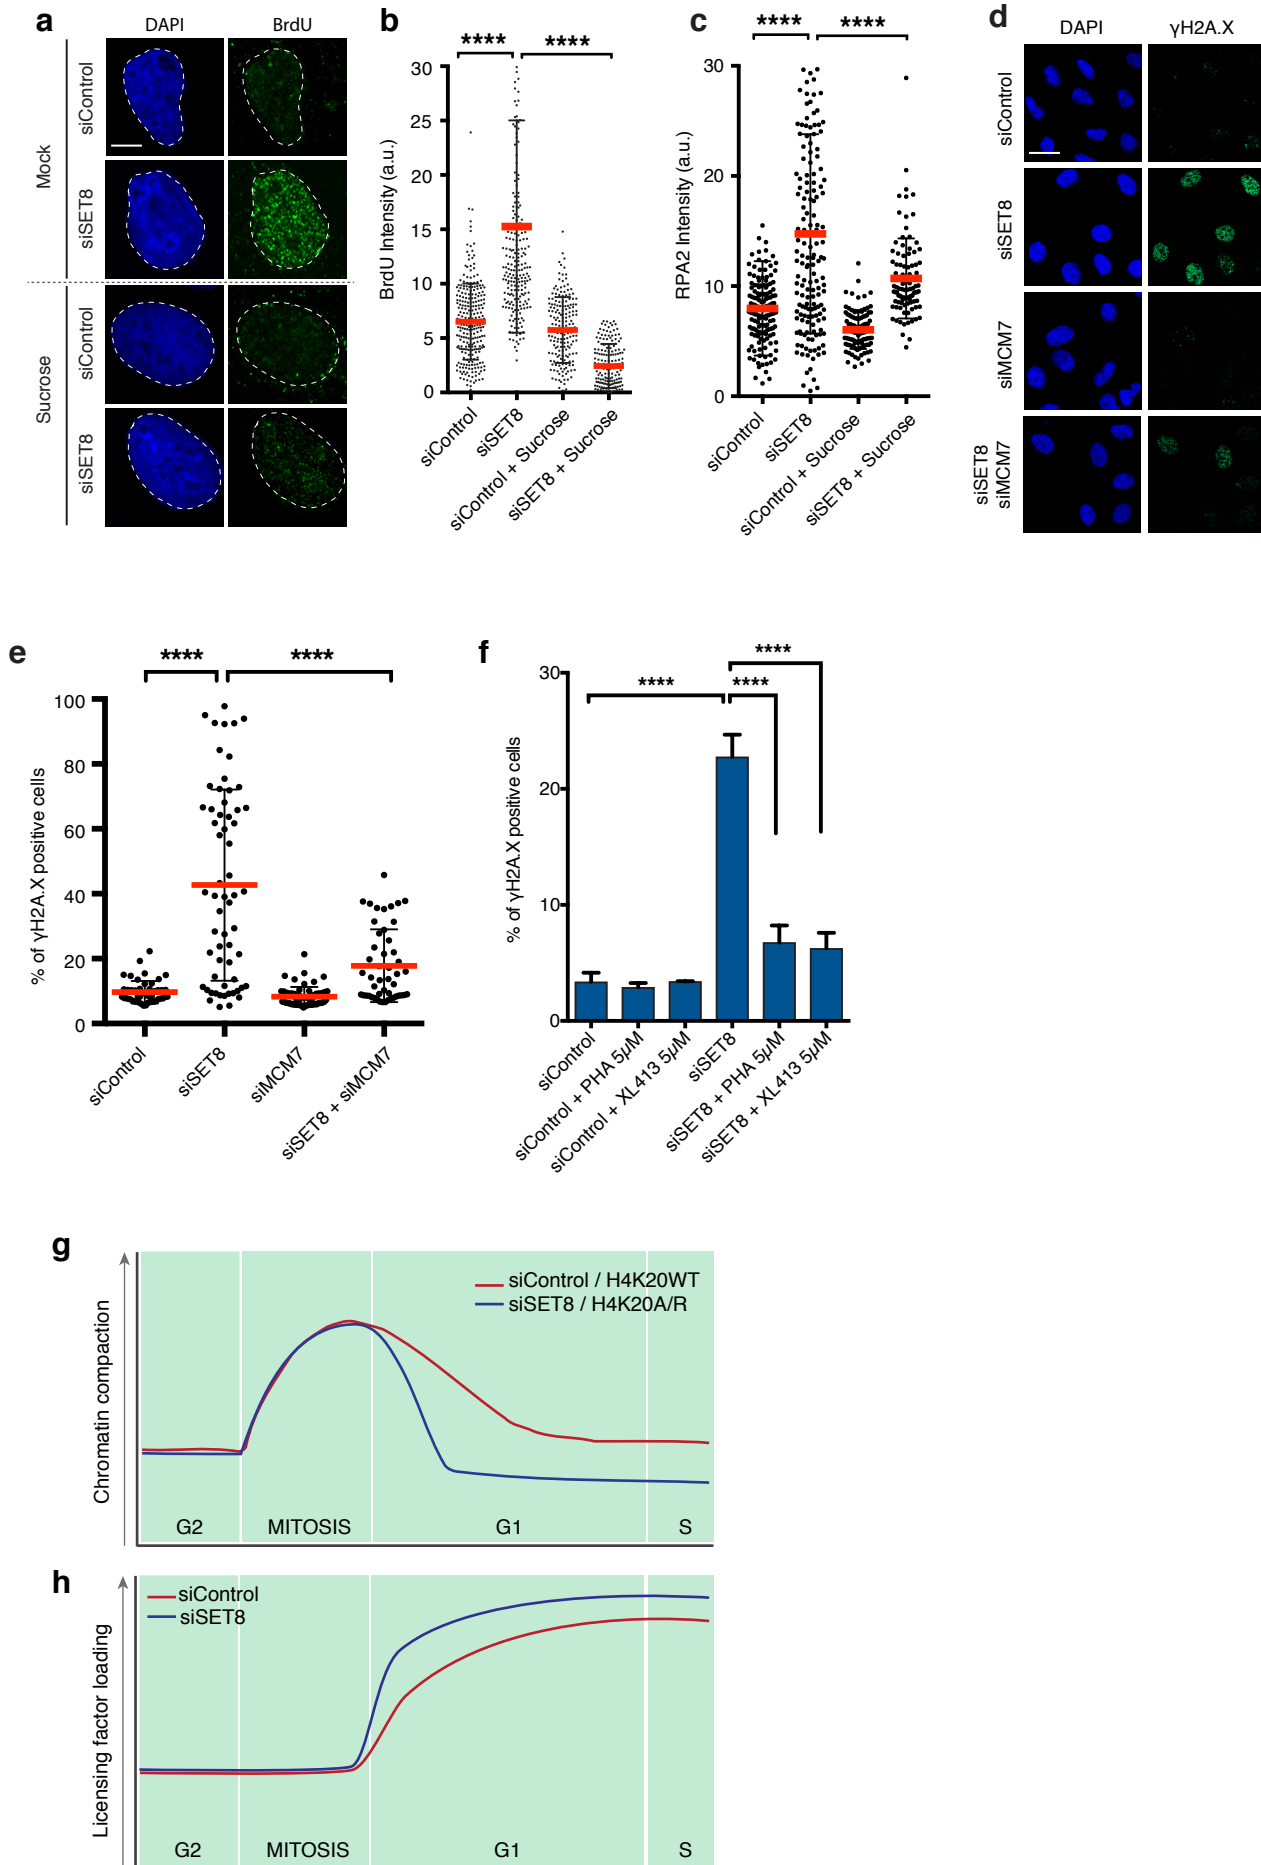

Source: https://www.biorxiv.org/content/10.1101/350033v1.full.pdf
